# Supplementary material for: Soil properties under different ecological restoration modes for the quarry in Yanshan mountains of Hebei province, China
Source: PeerJ. 2022 Nov 18;10:e14359. doi: 10.7717/peerj.14359 (PMC9677879; doi:10.7717/peerj.14359)
Supplement: Supplemental Information 6 — The relative abundance of major bacteria in soil microorganisms, involved seven samples (seven replicates for each sample) and a total of 49 original data. [file peerj-10-14359-s006.xlsx]

## Sheet: Sheet1
Proteobacteria	CK1	CK2	Rh	Mg	Me	Or	Pi
Num1	35.4901	39.3978	29.4584	39.0174	45.6987	34.0888	28.1825
Num2	41.4439	44.3658	36.2143	46.3662	49.1404	42.0811	36.1588
Num3	20.8212	26.3218	16.5098	22.6143	30.391	18.4991	16.1292
Num4	25.0812	32.3978	20.6458	30.6743	37.6398	24.0574	22.1825
Num5	24.7632	35.0328	23.5329	27.1655	33.0417	21.0672	20.2109
Num6	26.9544	30.0763	18.9051	33.8033	41.5737	27.3427	24.1954
Num7	29.6915	35.1882	25.9783	33.6992	42.6451	28.0876	25.1311
Acidobacteria	CK1	CK2	Rh	Mg	Me	Or	Pi
Num1	6.62332	39.2836	8.7343	23.6766	13.4648	37.8162	5.56003
Num2	11.622	43.2833	14.7388	29.6738	18.4443	43.8299	8.5644
Num3	2.1157	26.4543	3.3435	12.2811	5.2665	26.03	2.4778
Num4	3.0627	27.7093	4.07343	14.922	7.1575	30.0452	3.0038
Num5	5.0332	30.4683	4.7688	10.9066	8.1904	27.8234	3.8544
Num6	3.6582	33.6733	4.0891	18.5468	7.9433	33.1279	2.8643
Num7	4.16453	35.2601	5.28955	19.6779	9.46158	34.8056	3.26789
Firmicutes	CK1	CK2	Rh	Mg	Me	Or	Pi
Num1	33.6888	3.1369	22.0972	1.9854	2.2023	13.9513	34.6843
Num2	39.6543	5.1388	28.0211	2.884	5.0322	17.9299	38.721
Num3	19.4425	0.5653	11.8332	0.098	0.1944	5.1238	20.5456
Num4	23.3825	2.2123	14.8609	0.7687	0.472	7.19138	24.5316
Num5	20.549	1.7605	12.768	0.1435	0.5542	8.1768	22.8531
Num6	26.411	0.9963	16.7699	0.2055	0.4097	7.0966	26.5388
Num7	28.1204	1.2279	16.8446	0.219875	0.66577	10.9512	29.5536
Actinobacteria	CK1	CK2	Rh	Mg	Me	Or	Pi
Num1	17.2712	19.122	17.989	19.2393	19.3481	16.8165	4.95528
Num2	20.6533	22.114	20.9172	24.2332	24.3998	23.8433	6.81128
Num3	8.9633	7.95228	8.6558	8.4332	9.0483	8.6822	1.643
Num4	11.6527	11.7623	10.3198	10.2392	12.3705	10.6525	2.0157
Num5	10.0966	10.6591	9.9507	9.3411	11.6488	9.6532	1.7645
Num6	13.9731	13.7844	12.4766	12.0843	14.3543	12.8123	4.5632
Num7	13.2053	14.1118	13.3128	14.2393	16.3764	11.8215	3.03202
