# Supplementary material for: Soil properties under different ecological restoration modes for the quarry in Yanshan mountains of Hebei province, China
Source: PeerJ. 2022 Nov 18;10:e14359. doi: 10.7717/peerj.14359 (PMC9677879; doi:10.7717/peerj.14359)
Supplement: Supplemental Information 7 — The relative abundance of major fungi in soil microorganisms, involved seven samples (seven replicates for each sample) and a total of 49 original data. [file peerj-10-14359-s007.xlsx]

## Sheet: Sheet1
Ascomycota	CK1	CK2	Rh	Mg	Me	Or	Pi
NUM1	40.4054	65.0621	49.2543	66.8714	80.9281	50.1671	45.1589
NUM2	46.3221	71.0854	53.2763	72.8711	89.9432	57.5443	51.7881
NUM3	27.4324	49.5654	40.3234	57.4733	66.1328	38.6193	31.1654
NUM4	32.4054	53.0628	44.434	62.412	71.198	43.1609	35.1508
NUM5	29.6732	50.0753	40.8709	59.8747	69.1432	40.7081	33.5622
NUM6	35.0828	56.1264	48.5903	65.1717	73.8032	46.1793	37.2054
NUM7	36.6873	62.7736	46.2531	62.412	76.9227	46.1673	41.1113
Basidiomycota	CK1	CK2	Rh	Mg	Me	Or	Pi
NUM1	35.9042	5.8755	17.32	5.10829	8.8175	24.8211	35.6612
NUM2	41.6521	8.7932	22.3378	7.1588	11.8554	29.5451	40.2638
NUM3	21.4948	2.3534	8.3097	2.0012	3.2151	13.013	23.0651
NUM4	26.9448	3.01353	10.3208	2.8389	4.7531	16.0432	26.0601
NUM5	23.652	4.3456	8.0784	2.3522	4.0974	14.6122	27.0954
NUM6	29.9605	2.1902	14.7365	2.9566	5.8429	20.0784	25.7832
NUM7	30.985	3.50135	12.3238	3.25525	6.98175	20.0473	31.0861
Mucoromycota	CK1	CK2	Rh	Mg	Me	Or	Pi
NUM1	12.1567	5.24947	5.4436	2.836	3.6761	4.1074	4.2521
NUM2	14.3777	7.0032	7.2546	4.9353	5.2477	5.4039	6.5419
NUM3	7.9361	1.8546	2.10224	0.3418	1.2431	2.2012	1.0221
NUM4	9.2007	3.0986	3.1764	0.8853	2.0658	2.50072	2.0252
NUM5	7.2466	3.5993	3.4047	0.6541	2.6533	2.8433	2.2377
NUM6	12.9443	3.5421	3.3211	1.0322	1.8604	2.0543	2.5411
NUM7	9.102	3.87249	3.47218	2.13189	2.26761	2.89898	2.7648
Mortierellomycota	CK1	CK2	Rh	Mg	Me	Or	Pi
NUM1	2.06524	12.1216	1.9923	4.9296	6.7795	1.92931	3.66871
NUM2	2.65524	14.6333	4.1244	6.8622	8.8733	3.1315	6.8221
NUM3	1.042	6.2877	0.5855	1.351	2.0332	0.2054	0.4432
NUM4	1.136	8.6976	1.10225	3.0522	3.3545	0.60147	1.0071
NUM5	0.7855	8.0983	0.9843	2.5476	3.0541	0.6892	0.8943
NUM6	2.2543	9.2088	2.3265	4.1654	5.1206	1.0321	2.5091
NUM7	1.38652	11.1957	1.19702	3.72193	4.50788	0.757692	2.16605
