# Supplementary material for: Soil properties under different ecological restoration modes for the quarry in Yanshan mountains of Hebei province, China
Source: PeerJ. 2022 Nov 18;10:e14359. doi: 10.7717/peerj.14359 (PMC9677879; doi:10.7717/peerj.14359)
Supplement: Supplemental Information 8 — The soil physical and chemical properties, involved seven samples (seven replicates for each sample) and a total of 49 original data. [file peerj-10-14359-s008.xlsx]

## Sheet: allsample-soil physicochem_stat
pH	CK1	CK2	Rh	Mg	Me	Or	Pi
pH-1	9.42	8.83	8.95	8.17	7.67	8.23	8.65
pH-2	10.24	9.33	9.93	8.66	8.11	9.04	9.21
pH-3	7.42	7.66	8.02	6.1	6.04	5.69	7.06
pH-4	8.83	7.96	8.38	6.32	5.78	6.48	7.65
pH-5	8.41	8.32	7.68	6.04	7.1	7.21	7.11
pH-6	9	8.02	8.54	7.11	6.22	6.33	6.84
pH-7	8.89	8.22	8.45	6.83	6.59	7.08	8.17
TN/mg kg-1	CK1	CK2	Rh	Mg	Me	Or	Pi
TN-1	320.43	782.51	595.63	789.49	912.84	738.545	796.42
TN-2	343.23	822.61	645.76	829.78	981.77	778.55	848.43
TN-3	207.55	620.63	485.32	627.23	754.57	553.48	659.76
TN-4	261.82	710.82	520.63	689.85	804.53	613.78	720.72
TN-5	221.453	589.324	466.327	645.347	724.651	578.549	657.371
TN-6	294.613	742.834	555.013	759.875	852.828	688.375	770.354
TN-7	224.435	721.466	508.973	736.092	832.621	628.362	718.577
TP/mg kg-1	CK1	CK2	Rh	Mg	Me	Or	Pi
TP-1	641.92	1146.11	843.08	936.83	966.63	890.65	733.53
TP-2	686.83	1248.42	883.54	1036.86	996.64	1000.69	787.54
TP-3	503.75	876.72	651.27	727.34	742.69	730.39	551.78
TP-4	533.8	936.17	711.24	796.74	822.33	770.32	611.58
TP-5	563.754	945.144	698.459	776.653	816.572	766.49	589.739
TP-6	591.808	1086.12	783.048	846.782	886.613	830.381	671.503
TP-7	551.761	1136.09	745.323	829.276	898.665	824.846	667.587
TK/mg kg-1	CK1	CK2	Rh	Mg	Me	Or	Pi
TK-1	3460.86	5745.87	3690.85	4470.45	3270.42	3180.33	3490.13
TK-2	5480.83	7043.91	6460.56	7430.13	6240.68	5930.44	6270.35
TK-3	1020.61	2210.54	919.42	927.58	1137.59	1084.34	1648.33
TK-4	1060.22	2950.47	1019.82	1057.38	1470.88	1534.54	2028.43
TK-5	1100.59	2896.42	1179.84	1008.7	1398.65	1494.64	2108.81
TK-6	2242.6	4374.5	2061.9	2264.7	2254.7	2101.5	2224.9
TK-7	2276.54	4344.72	2109.48	2289.73	2312.11	2094.39	2194.66
AN/mg kg-1	CK1	CK2	Rh	Mg	Me	Or	Pi
AN-1	263.89	373.98	249.71	288.59	341.74	229.15	282.14
AN-2	296.31	443.38	299.65	332.22	427.36	289.44	332.28
AN-3	135.54	215.43	104.29	211.77	191.65	101.78	125.74
AN-4	155.39	249.518	133.271	238.19	221.54	139.55	167.24
AN-5	161.345	245.451	129.452	241.491	219.89	143.211	161.457
AN-6	193.809	309.555	189.877	258.139	276.538	179.522	202.211
AN-7	189.457	312.562	187.091	252.125	236.571	201.567	197.093
AP/mg kg-1	CK1	CK2	Rh	Mg	Me	Or	Pi
AP-1	8.85	8.13	9.22	10.91	9.25	8.92	12.79
AP-2	11.62	10.53	13.65	14.76	13.43	13.66	15.22
AP-3	4.75	3.123	5.41	6.0261	3.26	4.92	6.99
AP-4	6.02	5.38	6.79	8.02	4.98	5.21	8.61
AP-5	6.8411	5.8366	8.0155	7.8112	4.3721	6.0721	8.0344
AP-6	6.8385	6.1553	7.2112	8.8261	6.2795	6.0932	10.9379
AP-7	7.7655	6.9532	8.3286	9.8322	6.9822	7.3246	11.9021
AK/mg kg-1	CK1	CK2	Rh	Mg	Me	Or	Pi
AK-1	56.35	215.67	154.91	221.36	196.93	182.59	181.63
AK-2	74.69	242.54	173.21	281.86	226.73	222.09	213.52
AK-3	33.76	126.61	104.27	103.44	112.83	108.53	109.59
AK-4	40.15	155.63	117.92	123.98	143.33	125.71	123.406
AK-5	37.43	149.32	121.84	131.04	139.372	122.89	119.831
AK-6	49.185	175.985	124.939	183.846	173.856	143.52	147.451
AK-7	47.5609	171.093	131.094	179.941	169.844	137.39	151.804
OM/g kg-1	CK1	CK2	Rh	Mg	Me	Or	Pi
OM-1	4.27	33.23	7.73	18.92	16.32	12.84	9.432
OM-2	7.02	38.53	10.56	23.81	22.37	16.79	14.46
OM-3	0.88	19.59	2.01	7.98	6.33	5.38	3.06
OM-4	1.43	23.63	3.44	10.39	9.24	6.84	5.4244
OM-5	2.3621	17.6221	5.5711	12.479	8.4376	6.1277	7.0428
OM-6	2.2231	27.9643	5.6763	13.9464	12.2938	8.8699	6.4213
OM-7	3.6233	26.9455	7.6317	12.9316	10.2219	8.3127	7.1341
